# Supplementary material for: Correlates of the Women’s Development Army strategy implementation strength with household reproductive, maternal, newborn and child healthcare practices: a cross-sectional study in four regions of Ethiopia
Source: PubMed Central journal article supplement (PMC6157249; doi:10.1186/s12884-018-1975-y), 2018-09-24

BEmONC: Basic emergency obstetric and newborn care  
CBDDM: Community-Based Data for Decision-Making  
PCQI: Participatory Community Quality Improvement

L10K Platform strategies were CBDDM, Family Conversation  
and Birth Notification

PCQI, Referral Solutions  
and BEmONC

CBDDM

Family Conversation

Birth Notification

2011

2012

2013

2014

2015

Survey

Survey

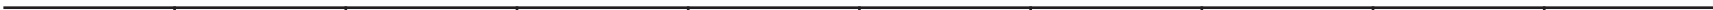

Supplement: 12884_2018_1975_MOESM2_ESM.pdf [file 12884_2018_1975_MOESM2_ESM.pdf]
