# Supplementary material for: Correlates of the Women’s Development Army strategy implementation strength with household reproductive, maternal, newborn and child healthcare practices: a cross-sectional study in four regions of Ethiopia
Source: PubMed Central journal article supplement (PMC6157249; doi:10.1186/s12884-018-1975-y), 2018-09-24

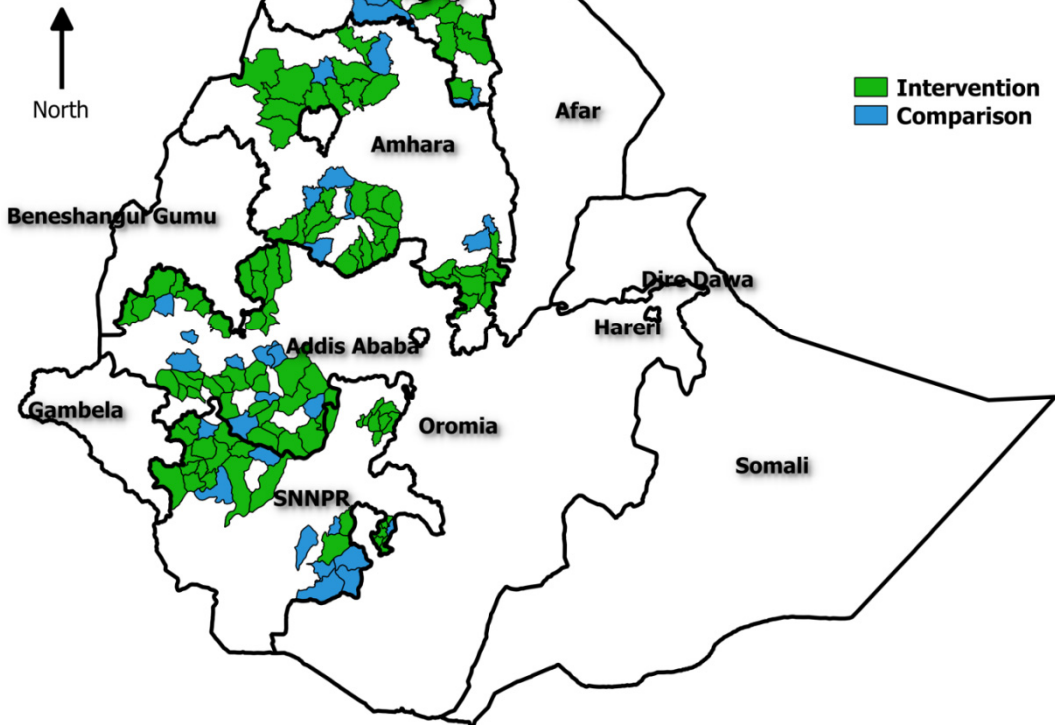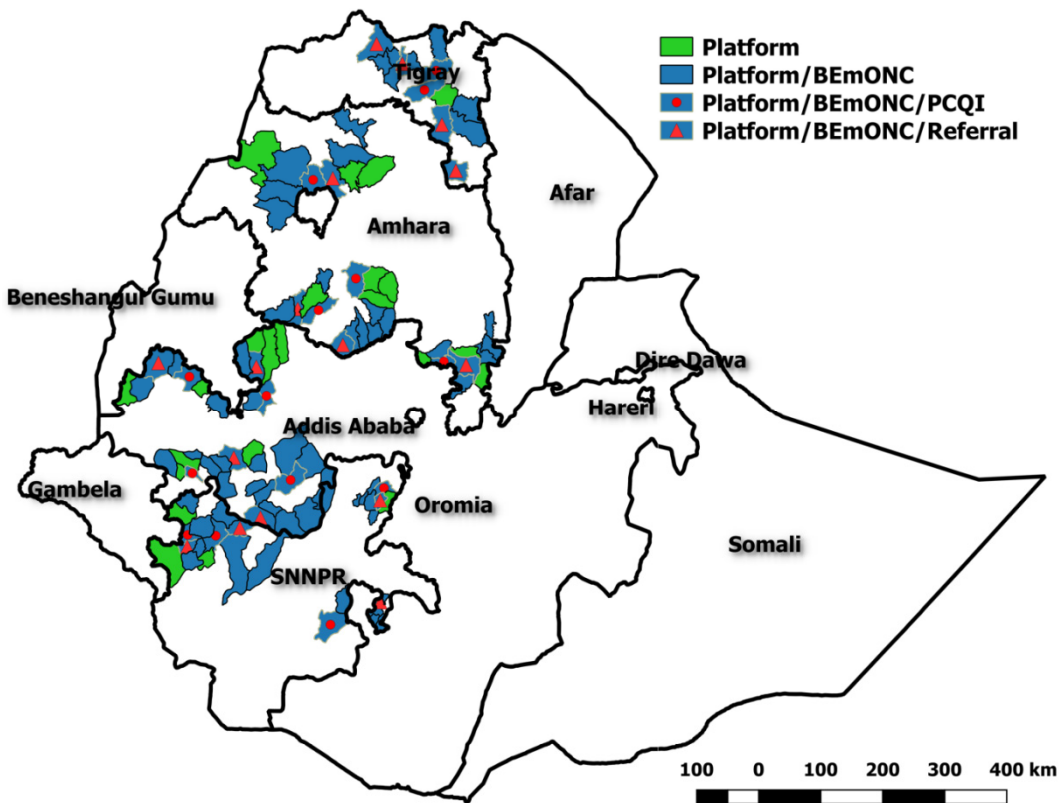

Supplement: 12884_2018_1975_MOESM3_ESM.pdf [file 12884_2018_1975_MOESM3_ESM.pdf]
